# Supplementary material for: Towards cell-adhesive, 4D printable PCL networks through dynamic covalent chemistry
Source: Royal Society of Chemistry journal article supplement (doi:10.1039/d4tb02423k), 2025-01-01
Supplement: d4tb02423k1.pdf [file d4tb02423k1.pdf]

## Supporting Information

### Towards cell-adhesive, 4D printable PCL Networks through dynamic covalent chemistry

Sagnik Ghosh <sup>a</sup>, Sathiyaraj Subramaniyan <sup>b</sup>, Anadi Bisht <sup>c,d</sup>, Bhanu Nandan <sup>a</sup>, Ritu

Kulshreshtha <sup>d</sup>, Minna Hakkarainen <sup>b</sup>, Rajiv K. Srivastava <sup>a,\*</sup>

<sup>a</sup> Department of Textile and Fibre Engineering, Indian Institute of Technology Delhi, Hauz

Khas, New Delhi-110016, India

<sup>b</sup> KTH Royal Institute of Technology, Department of Fibre and Polymer Technology,

Teknikringen 58, 100 44, Stockholm, Sweden

<sup>c</sup> School of Interdisciplinary Research, Indian Institute of Technology Delhi, Hauz Khas,

New Delhi-110016, India

<sup>d</sup> Department of Biochemical Engineering and Biotechnology, Indian Institute of Technology

Delhi, Hauz Khas, New Delhi-110016, India

\* Corresponding author – [rajiv@iitd.ac.in](mailto:rajiv@iitd.ac.in)

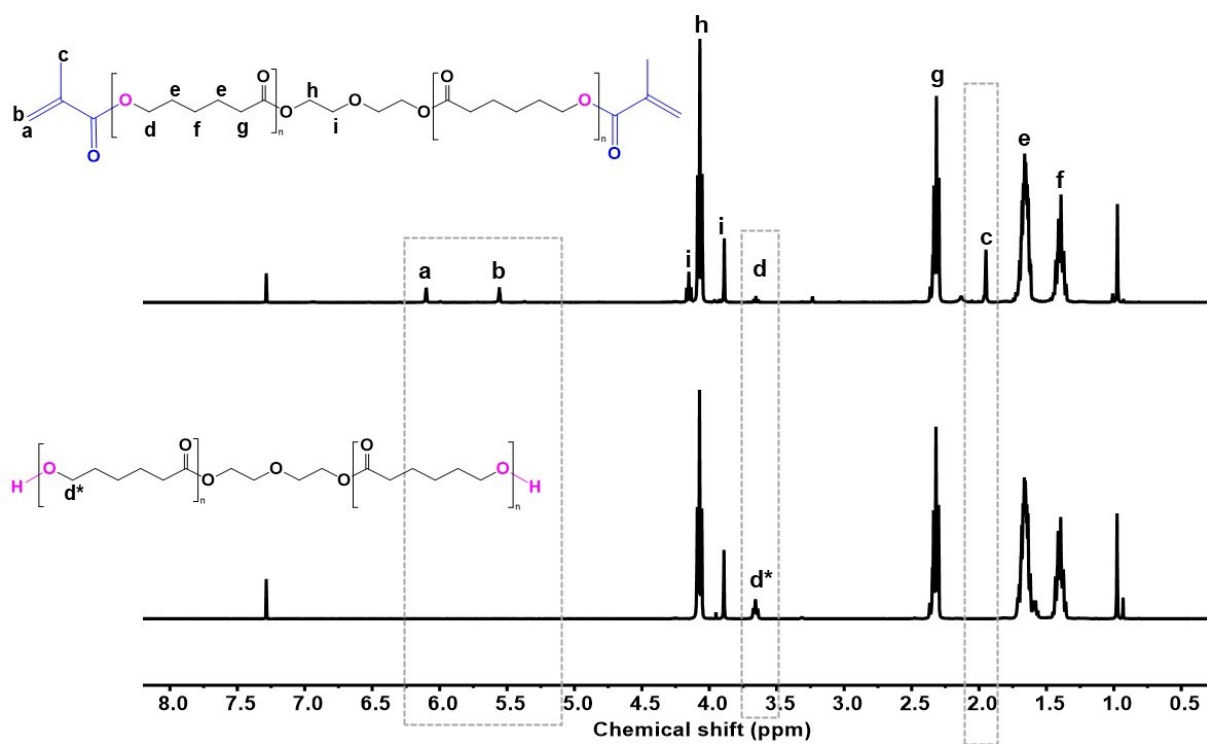

**Figure S1:**  $^1\text{H}$  NMR of polycaprolactone diol and PCLDMA

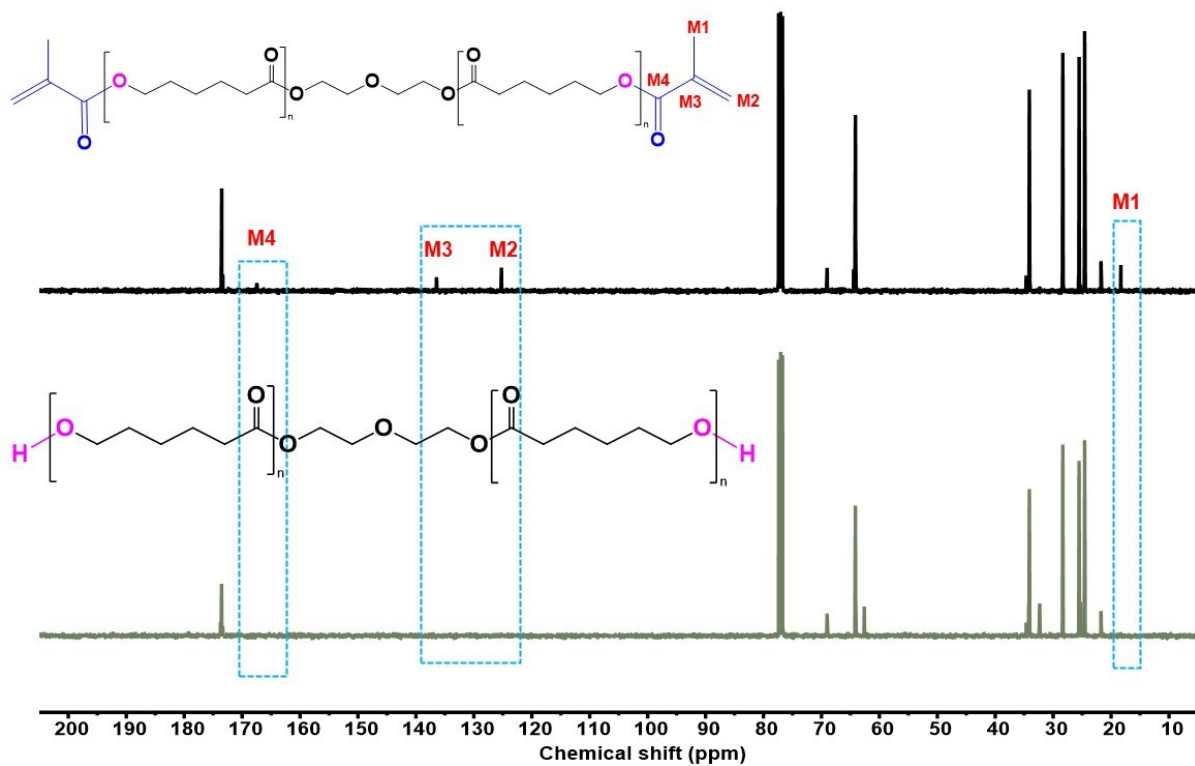

**Figure S2:**  $^{13}\text{C}$  NMR of polycaprolactone diol and PCLDMA

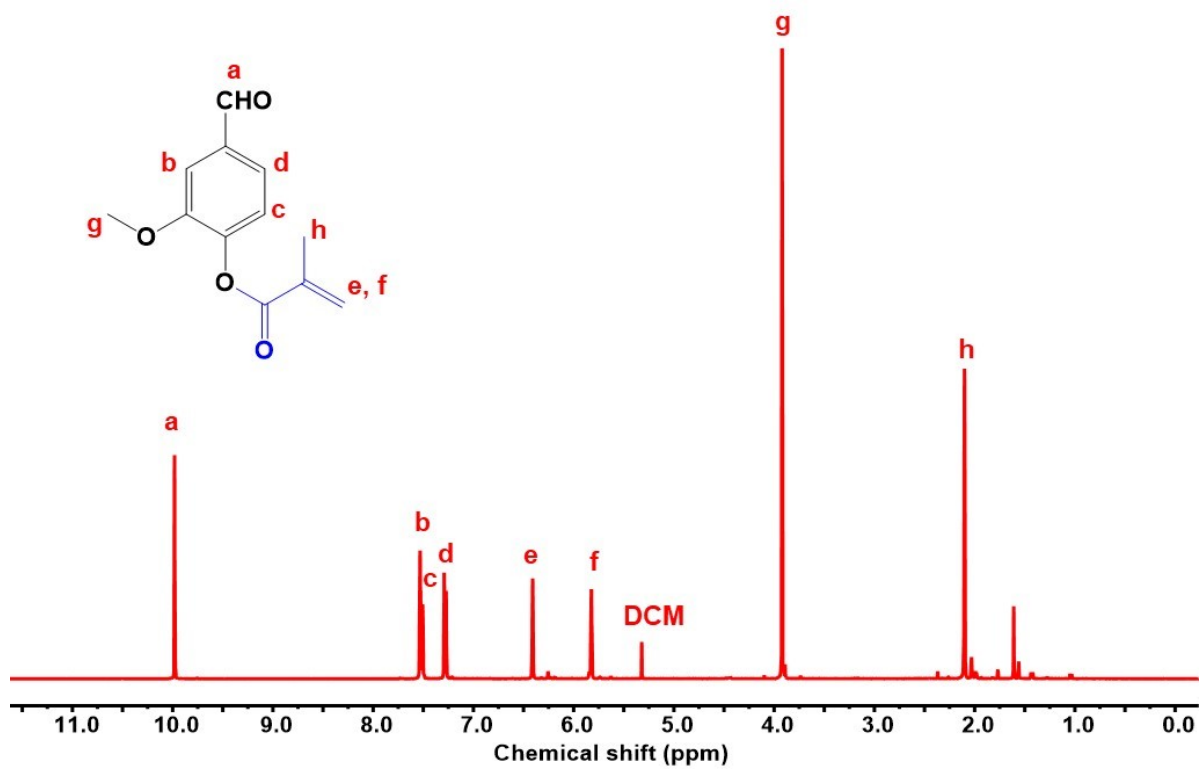

**Figure S3:** <sup>1</sup>H NMR of methacrylated vanillin

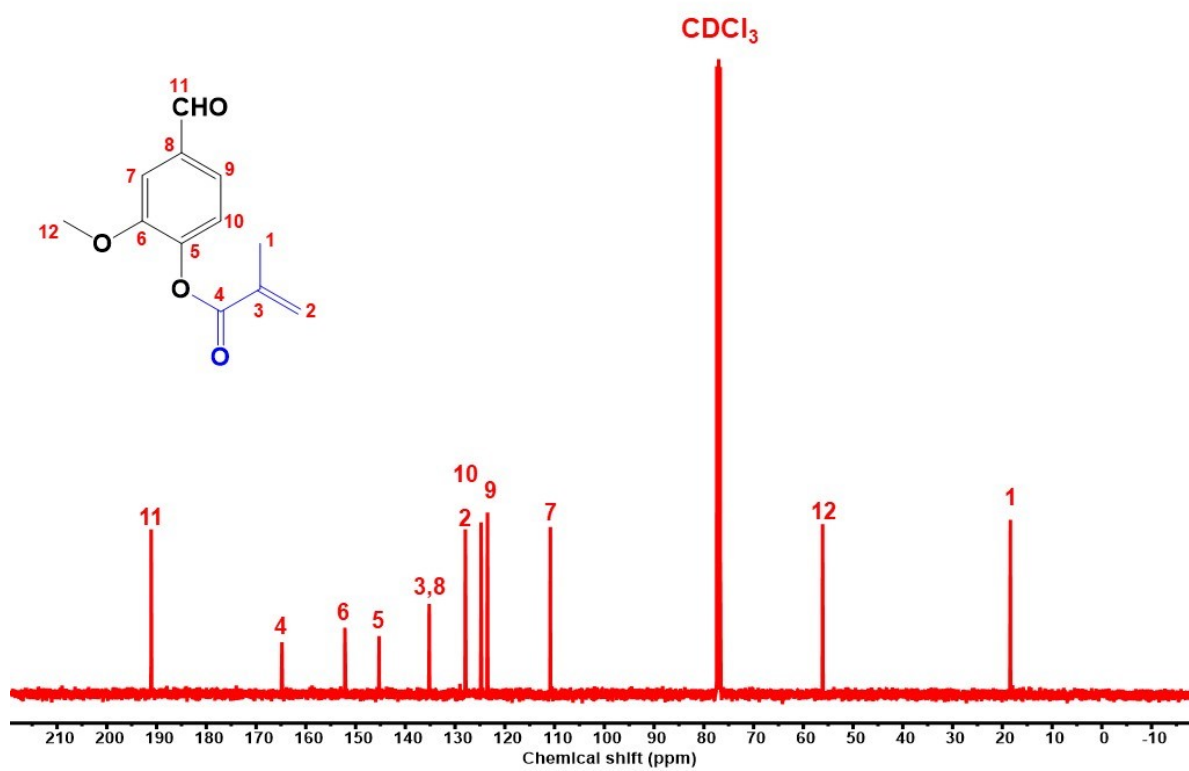

**Figure S4:**  $^{13}\text{C}$  NMR of methacrylated vanillin

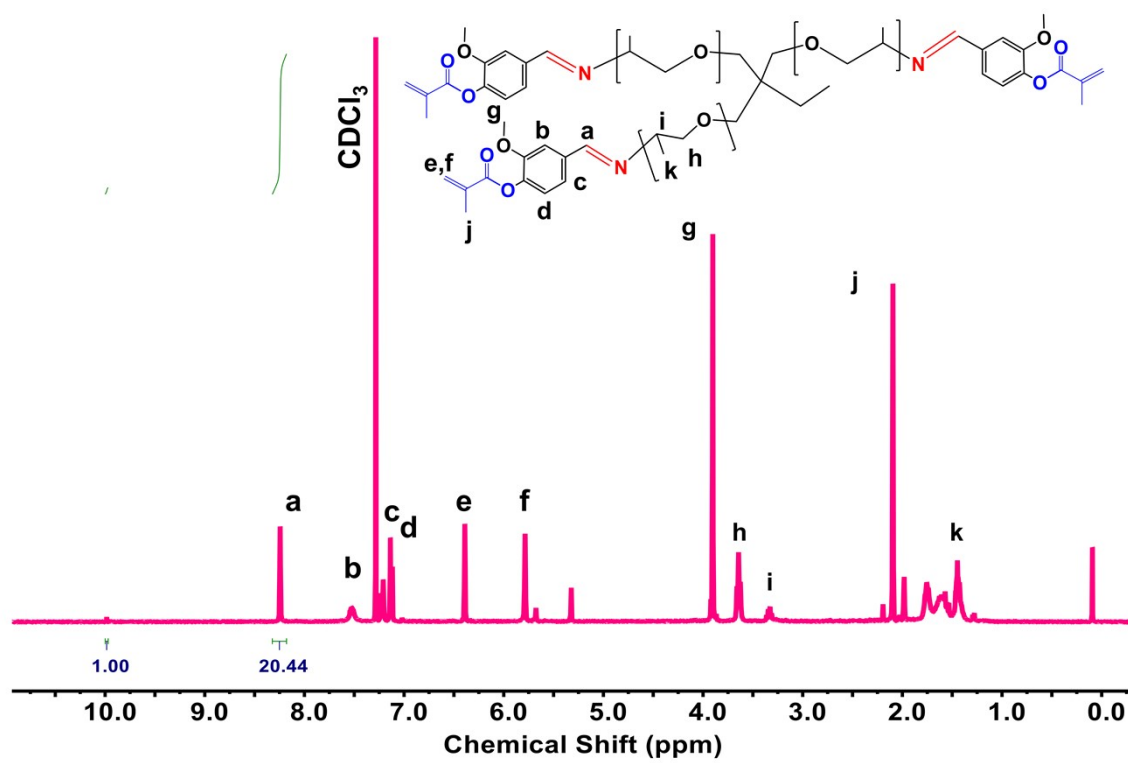

Figure S5:  $^1\text{H}$  NMR of imination of methacrylated vanillin

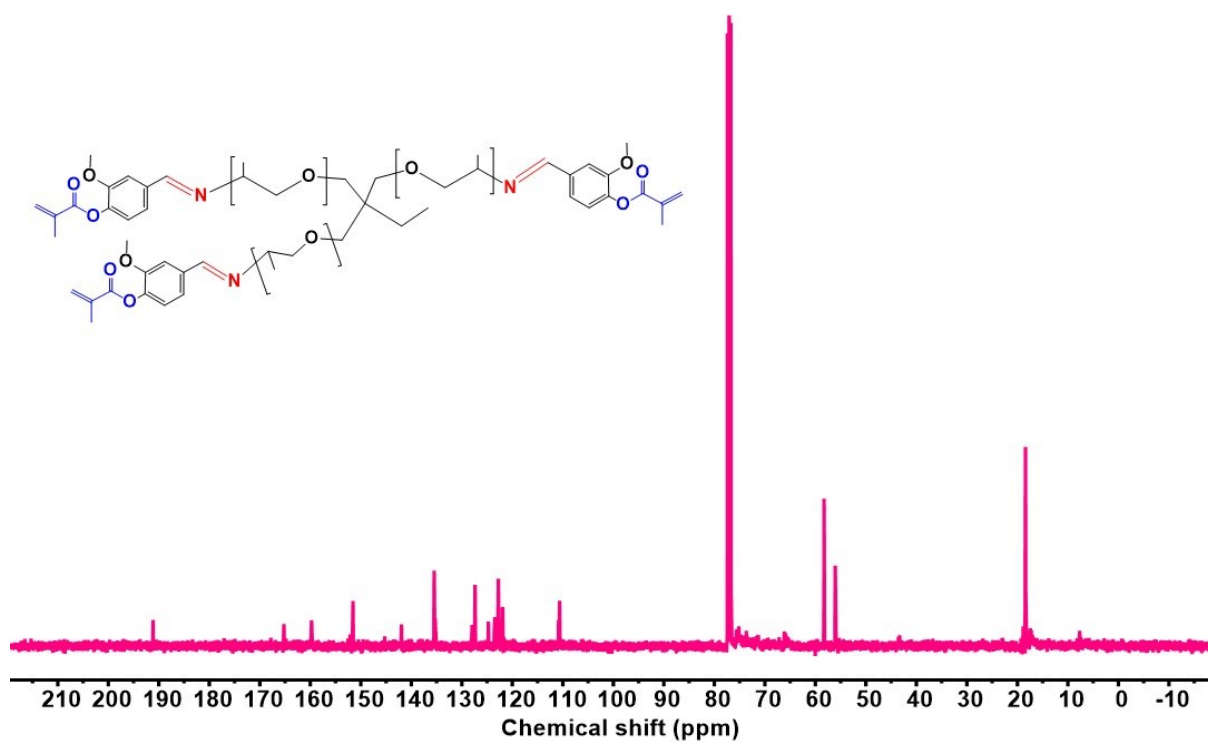

**Figure S6:**  $^{13}\text{C}$  NMR of imination of methacrylated vanillin

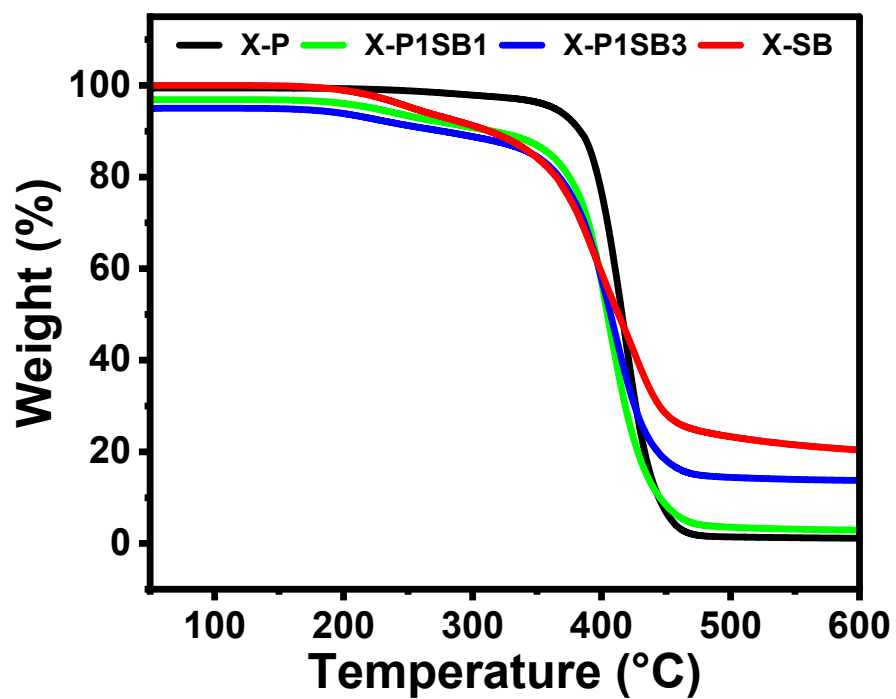

Figure S7: TGA thermogram of prepared scaffolds



**Table S1:** Thermal properties of X-P<sub>1</sub>SB<sub>1</sub> and X-P<sub>1</sub>SB<sub>3</sub>

| <b>Sample</b>                    | <b>DMA T<sub>g</sub></b> | <b>T<sub>5</sub></b> | <b>T<sub>d</sub></b> | <b>Residue at 600°C</b> | <b>G'<sub>37</sub> (Mpa)</b> | <b>ϕ<sub>e</sub> (mol/m<sup>3</sup>)</b> |
|----------------------------------|--------------------------|----------------------|----------------------|-------------------------|------------------------------|------------------------------------------|
| X-P <sub>1</sub> SB <sub>1</sub> | -22±3                    | 274±5                | 406±6                | 3.0±1.1                 | 7.9 ± 1.8                    | 2.43±0.02                                |
| X-P <sub>1</sub> SB <sub>3</sub> | 17.5±2                   | 271±2                | 409±3                | 14.4±0.6                | 21.9 ± 3.1                   | 3.21±0.1                                 |

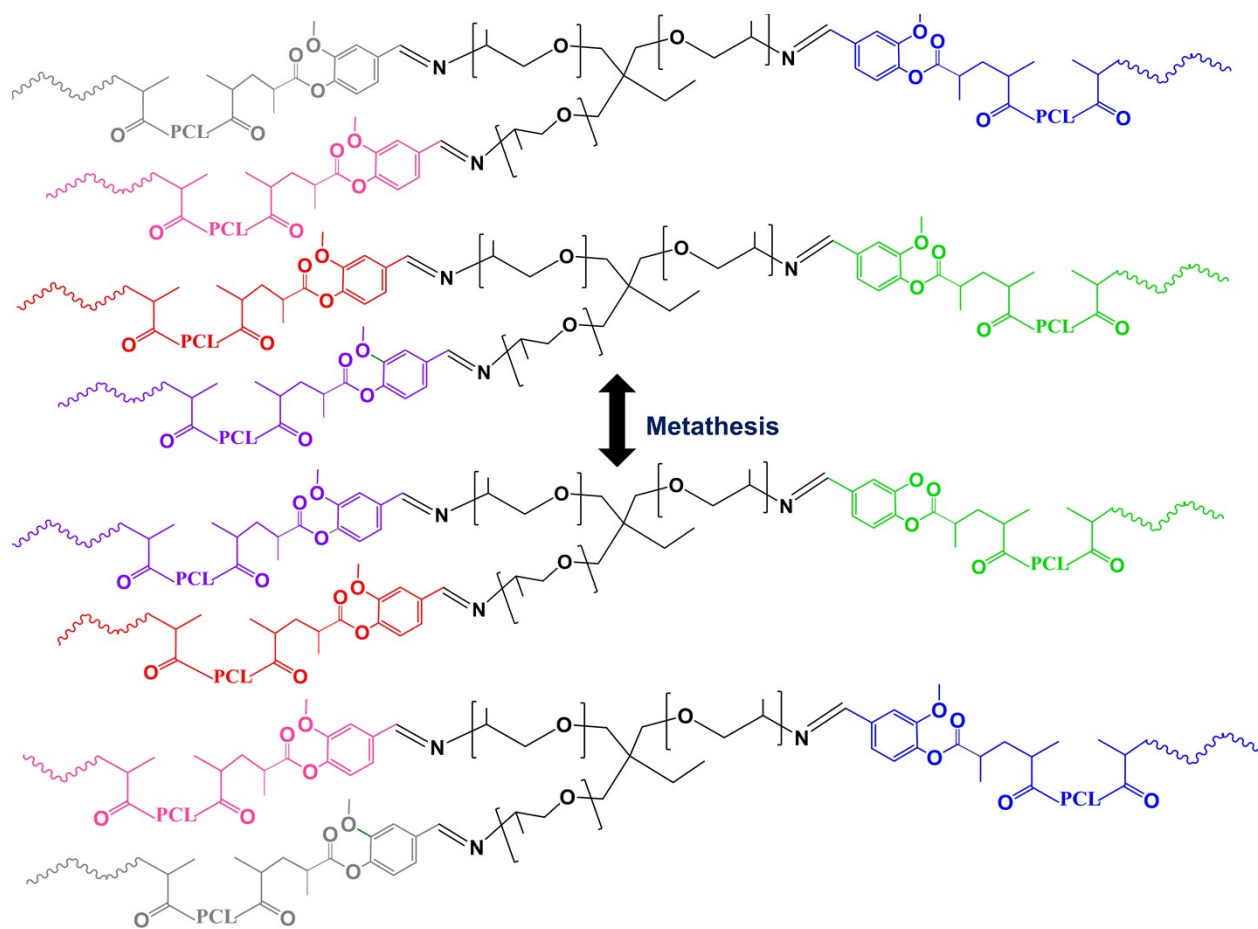

**Figure S8:** Mechanism of self-healing through imine metathesis for X-P<sub>1</sub>SB<sub>3</sub> scaffolds.

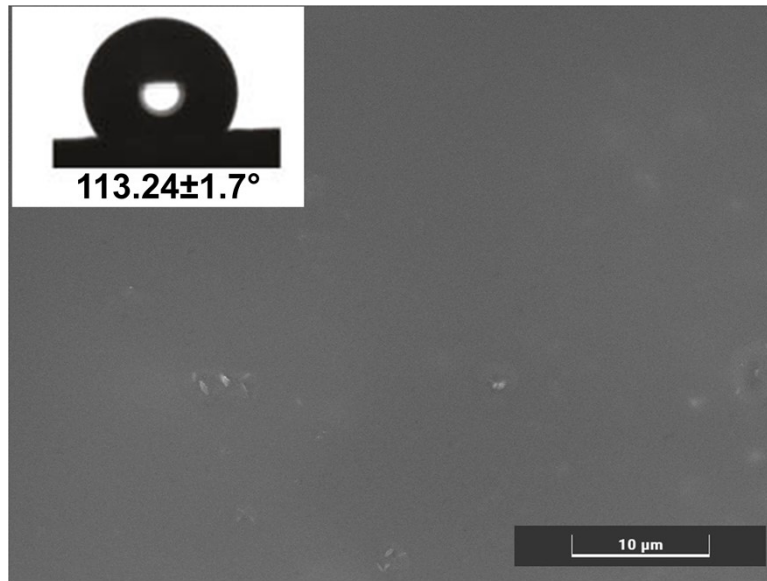

**Figure S9:** Surface morphology of pristine PCL scaffold.

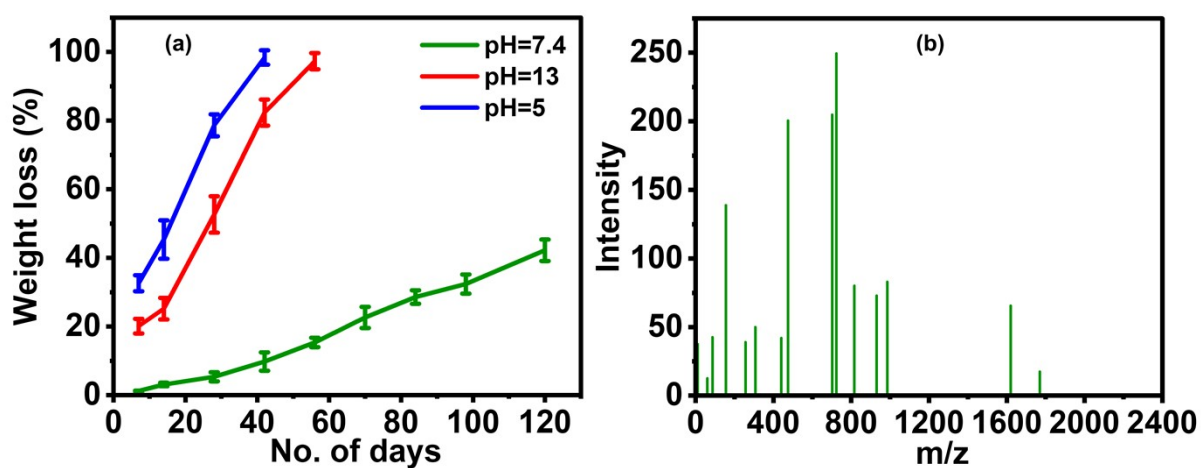

**Figure S10:** (a) Degradation profile of X-P<sub>1</sub>SB<sub>3</sub> under various pH levels, (b) mass spectra of X-P<sub>1</sub>SB<sub>3</sub> after hydrolytic degradation for 120 days at 37 °C.

**Table S2:** Peaks assignment for different  $m/z$  showing linear water-soluble degradation products

| <b>m/z</b> | <b>Degraded product</b>     |
|------------|-----------------------------|
| 11.108     | -                           |
| 60.434     | -                           |
| 86.425     | Methacrylic acid            |
| 155.143    | 6-hydroxy caproic acid + Na |
| 256.728    | -                           |
| 306.852    | Oligomer of Vanillin        |
| 440.295    | Jefm                        |
| 474.623    | H-CL <sub>4</sub> -OH       |
| 701.955    | H-CL <sub>6</sub> -OH       |
| 723.877    | H-CL <sub>6</sub> -OH+Na    |
| 816.420    | H-CL <sub>7</sub> -OH       |
| 930.450    | H-CL <sub>8</sub> -OH       |
| 985.345    | -                           |
| 1619.672   | H-CL <sub>14</sub> -OH      |
| 1620.502   | H-CL <sub>14</sub> -OH      |
| 1729.814   | H-CL <sub>15</sub> -OH      |

**Demonstration of Shape memory effect for X-P<sub>1</sub>SB<sub>3</sub>: Video VS1 and VS2**

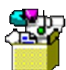

SM\_XP1SB3\_VS1

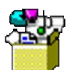

SM\_3DP\_XP1SB3\_VS2
